# Supplementary material
Source: PubMed Central journal article supplement (PMC7232888)

## Supplementary File: Chemical Structures of Saikosaponins

16-Keto Saikosaponin A

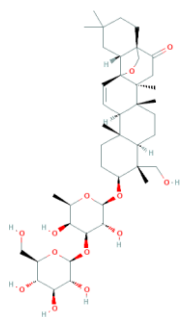

Saikosaponin 1b

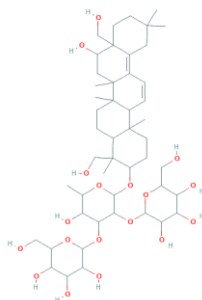

Saikosaponin 2

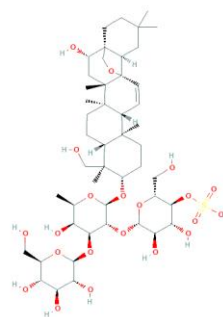

Saikosaponin B1

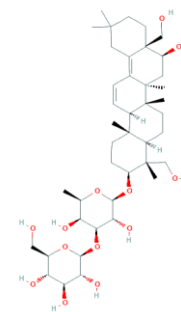

Saikosaponin A

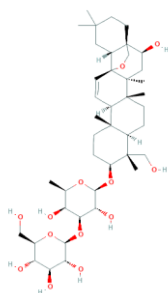

Saikosaponin B2

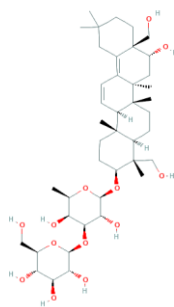

Saikosaponin B3

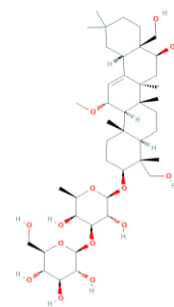

Saikosaponin B4

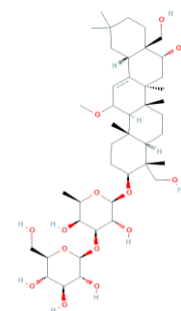

Saikosaponin BK1

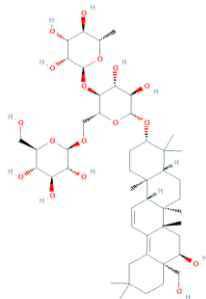

Saikosaponin C

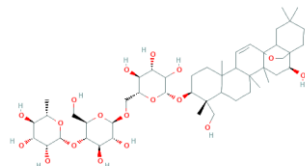

Saikosaponin D

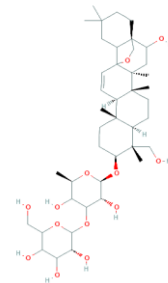

Saikosaponin E

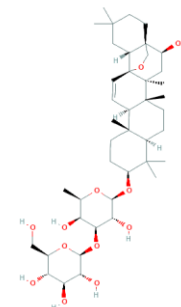

Saikosaponin F

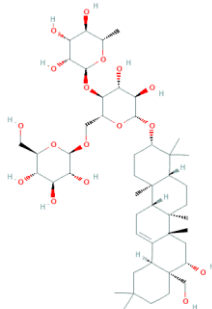

Saikosaponin G

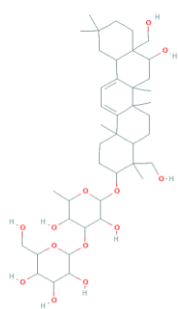

Saikosaponin H

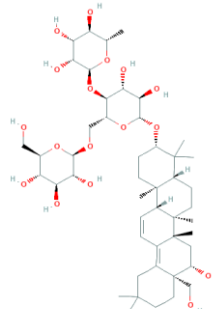

Saikosaponin I

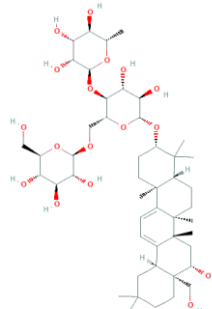

Saikosaponin K

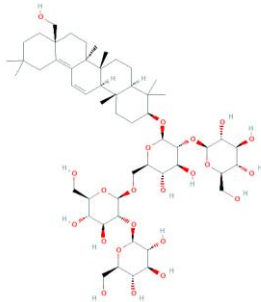

Saikosaponin N

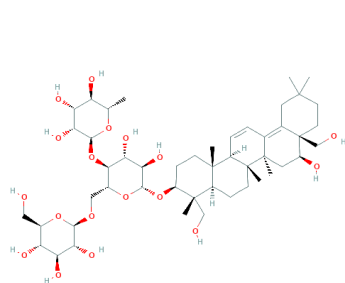

Saikosaponin O

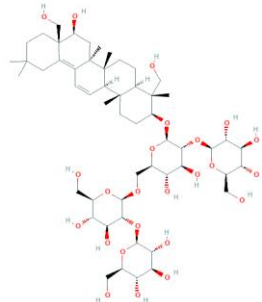

Saikosaponin Q

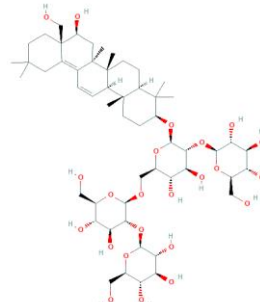

Saikosaponin R

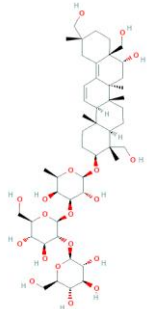

Saikosaponin U

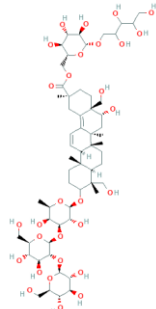

Saikosaponin V

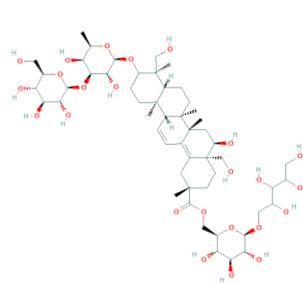

Supplement: TBSD_A_1762741_SM6317.pdf [file TBSD_A_1762741_SM6317.pdf]
